# Supplementary material for: Dysprosium-doped iron oxide nanoparticles boosting spin–spin relaxation: a computational and experimental study
Source: Royal Society of Chemistry journal article supplement (doi:10.1039/c9cp00463g), 2019-01-01
Supplement: c9cp00463g1.pdf [file c9cp00463g1.pdf]

# Supporting Information

## Dysprosium-doped iron oxide nanoparticles boosting spin-spin relaxation: computational and experimental study

Jinchang Yin,<sup>‡a</sup> Feihong Xu,<sup>‡a</sup> Hongbin Qu,<sup>a</sup> Chaorui Li,<sup>a</sup> Shiyi Liu,<sup>a</sup> Lizhi Liu<sup>b</sup> and  
Yuanzhi Shao<sup>\*a</sup>

---

<sup>a</sup> School of Physics, State Key Laboratory of Optoelectronic Materials and Technologies, Sun Yat-sen University, Guangzhou, 510275, P. R. China.

\*E-mail: [stssyz@mail.sysu.edu.cn](mailto:stssyz@mail.sysu.edu.cn)

<sup>b</sup> Center of Medical Imaging and Image-guided Therapy, Sun Yat-sen University Cancer Center, State Key Laboratory of Oncology in South China, Collaborative Innovation Center for Cancer Medicine, Guangzhou 510060, P. R. China.

<sup>‡</sup> Jinchang Yin and Feihong Xu contributed equally to this work.

**The explicit formula of the  $T_2$  relaxation rate  $r_2$  depending upon the saturation magnetization  $M_s$**

The explicit formula was provided by Bao<sup>S1,S2</sup>:

$$r_2 = \left( \frac{256\pi^2\gamma^2}{405} \right) \kappa M_s^2 R^2 / [D \left( 1 + \frac{L}{R} \right)], \quad (\text{S1})$$

where  $\gamma$  is the proton gyromagnetic ratio,  $M_s$  is saturation magnetization and  $R$  is effective radius of magnetic nanostructure.  $L$  is the thickness of an impermeable surface coating.  $D$  is the diffusivity of water, and  $\kappa$  is the conversion factor. In Gillis's model, all electronic spins are aligned and therefore crystal magnetic moment is  $N$  times of the individual electronic magnetic moment.  $N$  is the number of electrons in the crystal.

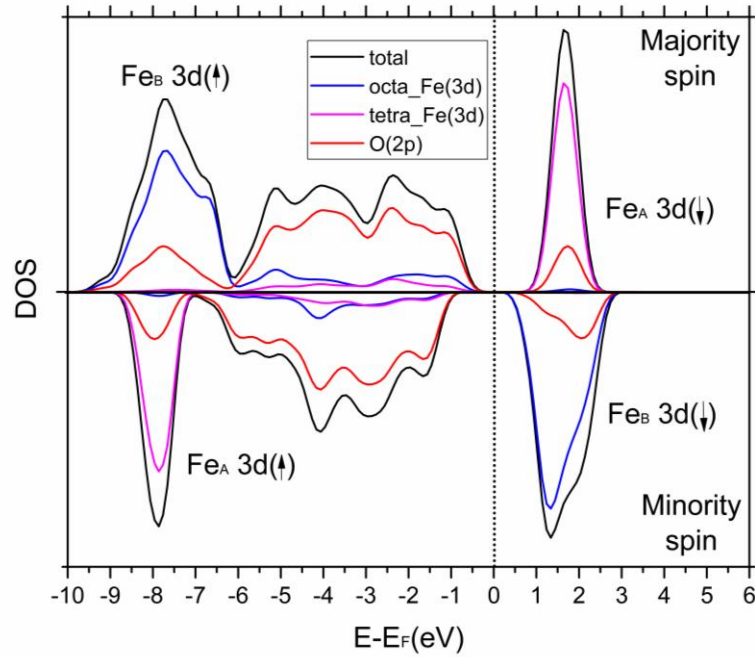

**Figure S1.** Electronic density of states of  $\gamma$ -Fe<sub>2</sub>O<sub>3</sub> with inverse spinel structure. Its projection over Fe 3d and O 2p orbitals is drawn. The magnetic moments on octahedral sites (in blue) and tetrahedral sites (in pink) are oriented in opposite directions. The majority part is set to positive, while the minority DOS is set to negative. The vertical short dashed line shows the Fermi energy of the system.

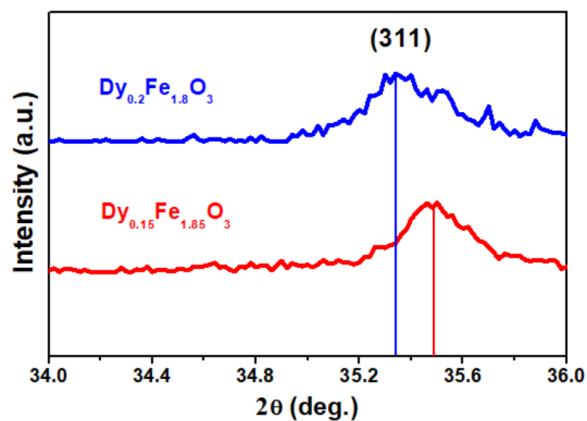

**Figure S2.** X-ray diffraction patterns of the Dy-doped  $\gamma$ - $Fe_2O_3$  nanoparticles at 7.5% (optimal doping) and 10%, respectively.

Figure S2 shows that the diffraction angle decreases slightly with increasing dysprosium content over the optimal doping. Based on the Bragg equation:  $2d\sin\theta = n\lambda$ , it is able to figure out that the interplanar spacing increases with doping dysprosium accordingly. Dysprosium ion has a much larger radius than iron does; therefore replacement of iron with dysprosium over the optimal doping amount brings about lattice expansion and distortion of  $\gamma$ - $Fe_2O_3$ .

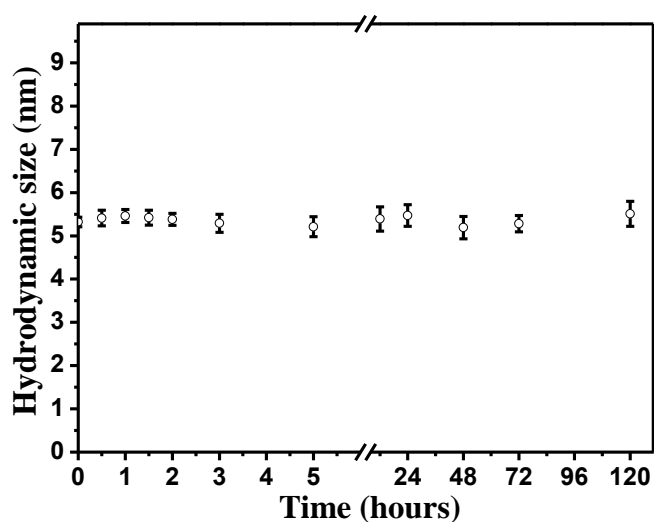

**Figure S3.** Size variation curve of PEG-coated Dy-doped  $\gamma$ -IOSNPs dispersed in aqueous solution at different temporal points, suggesting a good colloidal stability.

**Table S1.** Comparison of the conventional  $T_2$  contrast agents and the designed iron oxide nanoprobe for MRI

| Contrast agents                                                                                       | Particle               |                              | $r_2^b$<br>(mM <sup>-1</sup> s <sup>-1</sup> ) | $B_0^c$<br>(T) | Ref.         |
|-------------------------------------------------------------------------------------------------------|------------------------|------------------------------|------------------------------------------------|----------------|--------------|
|                                                                                                       | size (nm) <sup>a</sup> | Surface coating              |                                                |                |              |
| Feridex (Fe <sub>3</sub> O <sub>4</sub> ; $\gamma$ -Fe <sub>2</sub> O <sub>3</sub> ) <sup>d</sup>     | 4.96                   | dextran                      | 41                                             | 1.5            | S3           |
| Resovist (Fe <sub>3</sub> O <sub>4</sub> )                                                            | 4                      | carboxydextran               | 61                                             | 1.5            | S3           |
| Ferumoxtran (Fe <sub>3</sub> O <sub>4</sub> ; $\gamma$ -Fe <sub>2</sub> O <sub>3</sub> ) <sup>d</sup> | 4.5                    | dextran + citrate            | 66                                             | 1.4            | S4           |
| VSOP (Fe <sub>3</sub> O <sub>4</sub> ; $\gamma$ -Fe <sub>2</sub> O <sub>3</sub> ) <sup>d</sup>        | 4                      | citrate                      | 32                                             | 1.5            | S5           |
| Supravist (Fe <sub>3</sub> O <sub>4</sub> ; $\gamma$ -Fe <sub>2</sub> O <sub>3</sub> ) <sup>d</sup>   | 3-5                    | carbodextran                 | 57                                             | 1.5            | S6           |
| MION (Fe <sub>3</sub> O <sub>4</sub> )                                                                | 4.6                    | dextran                      | 34.8                                           | 0.47           | S7           |
| ESION ( $\gamma$ -Fe <sub>2</sub> O <sub>3</sub> )                                                    | 3                      | PEG <sup>e</sup>             | 29.2                                           | 3              | S8           |
| GdIO (Fe <sub>3</sub> O <sub>4</sub> + Gd <sub>2</sub> O <sub>3</sub> ) <sup>f</sup>                  | 3.5                    | dopamine sulfonate           | 34.38                                          | 0.5            | S9           |
| GdIO (Fe <sub>3</sub> O <sub>4</sub> + Gd <sub>2</sub> O <sub>3</sub> ) <sup>f</sup>                  | 4.8                    | dopamine sulfonate           | 41.14                                          | 0.5            | S9           |
| Fe <sub>3</sub> O <sub>4</sub> -PEG350                                                                | 4                      | PEG350                       | 39                                             | 1.4            | S10          |
| Fe <sub>3</sub> O <sub>4</sub> -PEG1100                                                               | 4                      | PEG1100                      | 17.5                                           | 1.4            | S10          |
| $\gamma$ -IOSNPs ( $\gamma$ -Fe <sub>2</sub> O <sub>3</sub> )                                         | 4.15                   | short chain<br>HOOC-PEG-COOH | 67.8                                           | 1.5            | this<br>work |
| Dy-doped $\gamma$ -IOSNPs<br>(Dy <sub>0.15</sub> Fe <sub>1.85</sub> O <sub>3</sub> )                  | 4.15                   | short chain<br>HOOC-PEG-COOH | 123.2                                          | 1.5            | this<br>work |

<sup>a</sup> The particle size is the size of magnetic particle under TEM observations without surface coating. <sup>b</sup>  $r_2$ : spin-spin relaxivity or transverse relaxivity. <sup>c</sup>  $B_0$ : magnetic field strength. <sup>d</sup> Crystal structure of magnetic particle is not demonstrated clearly. <sup>e</sup> PEG: polyethylene glycol. <sup>f</sup> Gd<sub>2</sub>O<sub>3</sub> is embedded in Fe<sub>3</sub>O<sub>4</sub> particles.

## References

- S1 Z. Zhou; R. Tian; Z. Wang; Z. Yang; Y. Liu; G. Liu; R. Wang; J. Gao; J. Song; L. Nie; X. Chen, *Nat. Commun.*, 2017, **8**, 15468.
- S2 S. Tong, S. Hou, Z. Zheng, J. Zhou and G. Bao, *Nano Lett.*, 2010, **10**, 4607-4613.
- S3 M. Rohrer, H. Bauer, J. Mintorovitch, M. Requardt, and H. Weinmann, *Invest. Radiol.*, 2005, **40**, 11.
- S4 Z. Zhao, Z. Zhou, J. Bao, Z. Wang, J. Hu, X. Chi, K. Ni, R. Wang, X. Chen, Z. Chen and J. Gao, *Nat. Commun.*, 2013, **4**, 2266.
- S5 M. F. Casula, P. Floris, C. Innocenti, A. Lascialfari, M. Marinone, M. Corti, R. A. Sperling, W. J. Parak and C. Sangregorio, *Chem. Mater.*, 2017, **22**, 1739-1748.
- S6 H. Wei, O. T. Bruns, M. G. Kaul, E. C. Hansen, M. Barch, A. Wisniowska, O. Chen, Y. Chen, N. Li, S. Okada, J. M. Cordero, M. Heine, C. T. Farrar, D. M. Montana, G. Adam, H. Itrich, A. Jasanoff, P. Nielsen and M. G. Bawendi, *Proc. Natl. Acad. Sci. U. S. A.*, 2017, **114**, 2325-2330.

- S7 N. Chan, M. Laprise-Pelletier, P. Chevallier, A. Bianchi, M. A. Fortin and J. K. Oh, *Biomacromolecules*, 2014, **15**, 2146-2156.
- S8 W. Lee., S. H. Son, B. Jin, J. Na, S. Kim, K. Kim, E. E. Kim, Y. G. Yu, and H. H. Lee. *Proc. Natl. Acad. Sci. U. S. A.*, 2013, **110**, 48.
- S9 Z. Zhou., L. Wang, X. Chi, J. Bao, L. Yang, W. Zhao, Z. Chen, X. Wang, X. Chen, and J. Gao, *ACS Nano*, 2013, **7**, 32887-3296.
- S10 U. I. Tromsdorf, O. T. Bruns, S. C. Salmen, U. Beisiegel, and H. Weller, *Nano Lett.*, 2009, **9**, 4434-4440.
